# Supplementary material for: The Role of Probiotics in Inducing and Maintaining Remission in Crohn’s Disease and Ulcerative Colitis: A Systematic Review of the Literature
Source: MDPI journal article supplement (doi:10.3390/biomedicines11020494), 2023-02-08
Supplement: s1 [file s1]

## Appendix B-Supplementary Data

| First author's name | Sample n | Time of measurent | Disease severity | Disease severity comments                 | Groups                | Probiotic | Spiecies used           | Primary outcomes                                                    | Main clinical outcome                                                                                                  |
|---------------------|----------|-------------------|------------------|-------------------------------------------|-----------------------|-----------|-------------------------|---------------------------------------------------------------------|------------------------------------------------------------------------------------------------------------------------|
| Bourreille A.       | 165      | 52 weeks          | Inactive disease | Crohn's disease activity index (CDAI<150) | Probiotics vs Placebo | N/A       | Saccharomyces boulardii | Crohn's disease activity index (CDAI) and blood-serological markers | Median time of relapse and achievement of remission differences were NS. Differences in decrease of CDAI were also NS. |

|             |     |          |                  |                                           |                                         |                                        |                                                                                                                                             |                                                                                                               |                                                                 |
|-------------|-----|----------|------------------|-------------------------------------------|-----------------------------------------|----------------------------------------|---------------------------------------------------------------------------------------------------------------------------------------------|---------------------------------------------------------------------------------------------------------------|-----------------------------------------------------------------|
| Fedorak R.  | 119 | 90 days  | Inactive disease | Patients with ileocolonic resection       | Probiotics vs Placebo                   | VSL#3(VSL Pharmaceuticals, Towson, MD) | L. paracasei , L. plantarum , L. acidophilus L. delbrueckii subsp bulgaricus , B. longum , B. breve,B. Infantis ,Streptococcus thermophilus | Endoscopic recurrence,Crohn's Disease Activity Index(CDAI) and Inflammatory Bowel Disease Questionnaire(IBQD) | Recurrence rates and CDAI and IBQD were similar in both groups. |
| Guslandi M. | 32  | 6 months | Inactive disease | Crohn's disease activity index (CDAI<150) | Mesalazine vs mesalazine and probiotics | N/A                                    | Saccharomyces boulardii                                                                                                                     | Crohn's disease activity index (CDAI)                                                                         | Fewer patients had relapse episodes in test group (SS results). |

|            |    |          |                  |                                                                 |                               |                                 |                             |                                                                          |                                                          |
|------------|----|----------|------------------|-----------------------------------------------------------------|-------------------------------|---------------------------------|-----------------------------|--------------------------------------------------------------------------|----------------------------------------------------------|
| Marteau P. | 98 | 6 months | Inactive disease | Recent surgical resection for ileal, ileocolonic, or colonic CD | Probiotics vs no intervention | LA1 (LC1; Nestle, Switzerland). | Lactobacillus johnsonii LA1 | CD activity index (CDAI), endoscopic score and blood-serological markers | NS differences in recurrence rates and endoscopic score. |
|------------|----|----------|------------------|-----------------------------------------------------------------|-------------------------------|---------------------------------|-----------------------------|--------------------------------------------------------------------------|----------------------------------------------------------|

|            |    |        |                  |                                                       |                       |                                     |                                          |                                                                                                                                                |                                                                                                                   |
|------------|----|--------|------------------|-------------------------------------------------------|-----------------------|-------------------------------------|------------------------------------------|------------------------------------------------------------------------------------------------------------------------------------------------|-------------------------------------------------------------------------------------------------------------------|
| Pantera C. | 45 | 1 year | Inactive disease | Complete surgical resection of all diseased intestine | Probiotics vs Placebo | Dicoflor 60 ( Dicofarm, Rome, Italy | Lactobacillus casei subspecies rhamnosus | Endoscopic scoring system( Rutgeerts score:(0–4) ), endoscopic recurrence, Crohn's disease activity index (CDAI) and blood-serological markers | Clinical recurrence was ascertained in more patients in test group. Endoscopic score was better in control group. |
|------------|----|--------|------------------|-------------------------------------------------------|-----------------------|-------------------------------------|------------------------------------------|------------------------------------------------------------------------------------------------------------------------------------------------|-------------------------------------------------------------------------------------------------------------------|

|            |    |          |                                      |                                               |                       |                                       |                          |                                                                                       |                                                                        |
|------------|----|----------|--------------------------------------|-----------------------------------------------|-----------------------|---------------------------------------|--------------------------|---------------------------------------------------------------------------------------|------------------------------------------------------------------------|
| Schultz M. | 11 | 6 months | Mild or moderate activity of disease | Crohn's disease activity index (CDAI:150-300) | Probiotics vs Placebo | LGG (CAG Functional Foods, Omaha, NE) | Lactobacillus GG (L. GG) | Crohn's disease activity index (CDAI), relapse time and recurrence rate               | NS differences in recurrence rates and relapse time                    |
| Steed H.   | 35 | 6 months | Mild or moderate activity of disease | Crohn's disease activity index (CDAI:150-450) | Probiotics vs Placebo | Synergy 1 (Orafti, Tienen, Belgium)   | Bifidobacterium longum   | Remission measured by Crohn's disease activity index (CDAI) and Histological analysis | Synbiotic group had improvement in CDAI scores and histological score. |

|              |    |          |                  |                                                       |                       |                                           |                              |                                                                    |                                                                                                     |
|--------------|----|----------|------------------|-------------------------------------------------------|-----------------------|-------------------------------------------|------------------------------|--------------------------------------------------------------------|-----------------------------------------------------------------------------------------------------|
| Van Gossn A. | 70 | 12 weeks | Active disease   | Patients scheduled for curative ileo-caecal resection | Probiotics vs Placebo | LA1 (LC1; Nestle, Switzerland).           | Lactobacillus johnsonii LA1  | Endoscopic score, histological score and blood-serological markers | Mean endoscopic score, relapse rate and mean histological score differences were NS for two groups. |
| Cui H.       | 30 | 2 months | Inactive disease | Endoscopic findings                                   | Probiotics vs Placebo | BIFICO (Jincheng Haisi Pharmaceutical Co) | Bifid Triple Viable Capsules | Blood-serological markers and fecal analysis                       | IL-1, TNF- $\alpha$ and IL-10 had higher decrease in test group                                     |

|           |    |         |                          |                                      |                                                         |     |             |                                                                |                                                                                                          |
|-----------|----|---------|--------------------------|--------------------------------------|---------------------------------------------------------|-----|-------------|----------------------------------------------------------------|----------------------------------------------------------------------------------------------------------|
| D'Inca R. | 26 | 8 weeks | Mild activity of disease | Endoscopic and histological findings | Probiotics PO vs Probiotics rectally vs no intervention | N/A | L. casei DG | Truelove–Witts scores and histological disease severity scores | Both orally and rectally given probiotics have shown SS improvement in clinical and histological scores. |
|-----------|----|---------|--------------------------|--------------------------------------|---------------------------------------------------------|-----|-------------|----------------------------------------------------------------|----------------------------------------------------------------------------------------------------------|

|           |    |         |                |                                                      |                       |                                     |                        |                                                                                                                |                                                                                                                                                                                  |
|-----------|----|---------|----------------|------------------------------------------------------|-----------------------|-------------------------------------|------------------------|----------------------------------------------------------------------------------------------------------------|----------------------------------------------------------------------------------------------------------------------------------------------------------------------------------|
| Furrie E. | 18 | 1 month | Active disease | Mean clinical activity index: PG 5,6 and control 4,7 | Probiotics vs Placebo | Synergy 1 (Orafti, Tienen, Belgium) | Bifidobacterium longum | Sigmoidoscopy score (SS), clinical activity index (CAI), bowel habit index (BHI) and blood-serological markers | Sigmoidoscopy scores(SS) and blood-serological markers(TNF-a and IL-1a) were reduced. Both clinical activity index (CAI) and bowel habit index (BHI) were reduced in test group. |
|-----------|----|---------|----------------|------------------------------------------------------|-----------------------|-------------------------------------|------------------------|----------------------------------------------------------------------------------------------------------------|----------------------------------------------------------------------------------------------------------------------------------------------------------------------------------|



|                 |    |        |                                      |     |                       |                                     |                                                                                    |                                                                         |                                                                                                                                      |
|-----------------|----|--------|--------------------------------------|-----|-----------------------|-------------------------------------|------------------------------------------------------------------------------------|-------------------------------------------------------------------------|--------------------------------------------------------------------------------------------------------------------------------------|
| Hideki Ishikawa | 21 | 1 year | Mild or moderate activity of disease | N/A | Probiotics vs Placebo | BMF (Yakult Co., Ltd. Tokyo, Japan) | Bifidobacterium breve, Bifidobacterium bifidum, Lactobacillus acidophilus YIT 0168 | Colonoscopy findings, blood-serological markers and microflora analysis | Exacerbation of symptoms were seen in fewer patients in test group than control.No difference was seen in the colonoscopic findings. |
|-----------------|----|--------|--------------------------------------|-----|-----------------------|-------------------------------------|------------------------------------------------------------------------------------|-------------------------------------------------------------------------|--------------------------------------------------------------------------------------------------------------------------------------|

|                 |    |        |                                                |                       |                       |                                             |                       |                                                                                                 |                                                                                                                 |
|-----------------|----|--------|------------------------------------------------|-----------------------|-----------------------|---------------------------------------------|-----------------------|-------------------------------------------------------------------------------------------------|-----------------------------------------------------------------------------------------------------------------|
| Hideki Ishikawa | 41 | 1 year | Patients with both active and inactive disease | Accessed by endoscopy | Probiotics vs Placebo | BbY and GOS (Yakult Co., Ltd. Tokyo, Japan) | Bifidobacterium breve | Matts classification (endoscopic score), Myeloperoxidase analysis (MPO) in lavage solution (LS) | Endoscopic score of the treatment group was significantly lower. MPO amounts in the LS significantly decreased. |
|-----------------|----|--------|------------------------------------------------|-----------------------|-----------------------|---------------------------------------------|-----------------------|-------------------------------------------------------------------------------------------------|-----------------------------------------------------------------------------------------------------------------|

|          |     |         |                |                                   |                       |                                            |                              |                                                                 |                                                                                                                |
|----------|-----|---------|----------------|-----------------------------------|-----------------------|--------------------------------------------|------------------------------|-----------------------------------------------------------------|----------------------------------------------------------------------------------------------------------------|
| Huang M. | 360 | 8 weeks | Active disease | Disease activity index (DAI: 7,8) | Probiotics vs Placebo | BIFICO (Jincheng Haisi Pharmaceuticals Co) | Bifid Triple Viable Capsules | UC Disease activity index (UCDAI) and blood-serological markers | Higher decrease in UCDAI score and symptoms in test group. TNF- $\alpha$ and IL-8 were decreased in test group |
|----------|-----|---------|----------------|-----------------------------------|-----------------------|--------------------------------------------|------------------------------|-----------------------------------------------------------------|----------------------------------------------------------------------------------------------------------------|

|            |    |         |                                      |                                      |                       |                                                |                                                                                                                                                      |                                                                             |                                                                                                         |
|------------|----|---------|--------------------------------------|--------------------------------------|-----------------------|------------------------------------------------|------------------------------------------------------------------------------------------------------------------------------------------------------|-----------------------------------------------------------------------------|---------------------------------------------------------------------------------------------------------|
| Kamarli H. | 40 | 8 weeks | Mild or moderate activity of disease | Truelove-Witts Clinic Activity Index | Probiotics vs Placebo | Nobel Pharmaceutical Company, Istanbul, Turkey | Enterococcus faecium, Lactobacillus plantarum, Streptococcus thermophilus, Bifidobacterium lactis, Lactobacillus acidophilus, Bifidobacterium longum | Blood-serological markers and endoscopic scores and clinical activity index | SS differences in decrease of endoscopic and clinical index score. Test group achieved higher decrease. |
|------------|----|---------|--------------------------------------|--------------------------------------|-----------------------|------------------------------------------------|------------------------------------------------------------------------------------------------------------------------------------------------------|-----------------------------------------------------------------------------|---------------------------------------------------------------------------------------------------------|

|         |    |          |                                      |     |                       |                                     |                                                                                    |                                                                                                                                                    |                                                                                                 |
|---------|----|----------|--------------------------------------|-----|-----------------------|-------------------------------------|------------------------------------------------------------------------------------|----------------------------------------------------------------------------------------------------------------------------------------------------|-------------------------------------------------------------------------------------------------|
| Kato K. | 20 | 12 weeks | Mild or moderate activity of disease | N/A | Probiotics vs Placebo | BMF (Yakult Co., Ltd. Tokyo, Japan) | Bifidobacterium breve, Bifidobacterium bifidum, Lactobacillus acidophilus YIT 0168 | Clinical activity index (CAI), endoscopic activity index score, Histopathological inflammatory activity and absence of remission based on symptoms | CAI score, endoscopic score and histological score were significantly lower in treatment group. |
|---------|----|----------|--------------------------------------|-----|-----------------------|-------------------------------------|------------------------------------------------------------------------------------|----------------------------------------------------------------------------------------------------------------------------------------------------|-------------------------------------------------------------------------------------------------|

|          |     |          |                  |                                                                  |                          |                                               |                                          |                                                                         |                                                                                                             |
|----------|-----|----------|------------------|------------------------------------------------------------------|--------------------------|-----------------------------------------------|------------------------------------------|-------------------------------------------------------------------------|-------------------------------------------------------------------------------------------------------------|
| Kruis W. | 120 | 12 weeks | Inactive disease | Disease in remission measured by clinical activity index (CAI<4) | Probiotics vs mesalazine | Mutaflor (Ardeypharm GmbH, Herdecke, Germany) | E.coli Nissle 1917 (Serotype O6: K5: H1) | Clinical activity index (CAI), histological findings, relapse free time | No significant differences both in CAI scores and relapse rate. Relapse free time differences were also NS. |
|----------|-----|----------|------------------|------------------------------------------------------------------|--------------------------|-----------------------------------------------|------------------------------------------|-------------------------------------------------------------------------|-------------------------------------------------------------------------------------------------------------|

|       |    |         |                |                   |                               |                                           |                              |                                                                      |                                                                                                                                                                        |
|-------|----|---------|----------------|-------------------|-------------------------------|-------------------------------------------|------------------------------|----------------------------------------------------------------------|------------------------------------------------------------------------------------------------------------------------------------------------------------------------|
| Li G. | 82 | 60 days | Active disease | Mayo score for UC | Probiotics vs no intervention | BIFICO (Jincheng Haisi Pharmaceutical Co) | Bifid Triple Viable Capsules | Mayo score for UC, histological scores and blood-serological markers | No significant differences in decrease of clinical symptoms and blood-serological markers between groups. Both groups had decreased inflammation markers and symptoms. |
|-------|----|---------|----------------|-------------------|-------------------------------|-------------------------------------------|------------------------------|----------------------------------------------------------------------|------------------------------------------------------------------------------------------------------------------------------------------------------------------------|

|             |     |          |                                      |                                                                          |                                  |                                               |                                                                                    |                                                                                                                |                                                                         |
|-------------|-----|----------|--------------------------------------|--------------------------------------------------------------------------|----------------------------------|-----------------------------------------------|------------------------------------------------------------------------------------|----------------------------------------------------------------------------------------------------------------|-------------------------------------------------------------------------|
| Matsuoka K. | 192 | 48 weeks | Inactive disease                     | Disease in remission measured by Sutherland disease activity index (DAI) | Probiotics vs Placebo            | BMF (Yakult Co., Ltd. Tokyo, Japan)           | Bifidobacterium breve, Bifidobacterium bifidum, Lactobacillus acidophilus YIT 0168 | Relapse-free survival measured by Sutherland disease activity index                                            | NS differences in both relapse-free survival or clinical deterioration. |
| Matthes H.  | 90  | 2 weeks  | Mild or moderate activity of disease | Disease activity measured by Disease Activity Index (DAI:4-9)            | Probiotics(max doses) vs Placebo | Mutaflor (Ardeypharm GmbH, Herdecke, Germany) | E.coli Nissle 1917 (Serotype O6: K5: H1)                                           | Clinical remission by Disease Activity Index (DAI<2), endoscopic mucosal healing and blood-serological markers | Dose dependent efficacy in both remission time and endoscopic findings. |



|       |    |         |                                      |                                       |                       |                                                  |                                                                                                                                             |                                                                        |                                                |
|-------|----|---------|--------------------------------------|---------------------------------------|-----------------------|--------------------------------------------------|---------------------------------------------------------------------------------------------------------------------------------------------|------------------------------------------------------------------------|------------------------------------------------|
| Ng S. | 28 | 8 weeks | Mild or moderate activity of disease | UC Disease Activity Index (UCDAI:3-8) | Probiotics vs Placebo | VSL#3 (VSL Pharmaceuticals, Fort Lauderdale, FL) | L. paracasei , L. plantarum , L. acidophilus L. delbrueckii subsp bulgaricus , B. longum , B. breve,B. Infantis ,Streptococcus thermophilus | UC disease activity index (UCDAI) and Tissue Histologic Activity Index | More patients achieved remission in test group |
|-------|----|---------|--------------------------------------|---------------------------------------|-----------------------|--------------------------------------------------|---------------------------------------------------------------------------------------------------------------------------------------------|------------------------------------------------------------------------|------------------------------------------------|

|             |    |           |                                        |                                |                                         |                                               |                                                                                          |                                                                                                               |                                                                                                      |
|-------------|----|-----------|----------------------------------------|--------------------------------|-----------------------------------------|-----------------------------------------------|------------------------------------------------------------------------------------------|---------------------------------------------------------------------------------------------------------------|------------------------------------------------------------------------------------------------------|
| Palumbo V.  | 60 | 24 months | Moderate to severe activity of disease | MMDAI:8-12                     | Mesalazine vs mesalazine and probiotics | Acronelle ( Bromatech srl, Milan, Italy)      | Lactobacillus salivarius, Lactobacillus acidophilus, Bifidobacterium bifidus strain BGN4 | Modified Mayo Disease Activity Index (MMDAI ) measuring rectal bleeding, endoscopic score and stool frequency | Better improvement compared to control.                                                              |
| Petersen A. | 50 | 7 weeks   | Mild or moderate activity of disease   | Colitis Activity Index (CAI)>5 | Probiotics vs Placebo                   | Mutaflor (Ardeypharm GmbH, Herdecke, Germany) | E.coli Nissle 1917 (Serotype O6: K5: H1)                                                 | Achievement of remission measured by Colitis Activity Index (CAI:<4)                                          | Group receiving probiotics had fewer patients achieving remission and higher numbers in withdrawals. |

|                   |     |        |                   |                                                                                                 |                                |                                                           |                                                         |                                                                                                      |                                                                                                       |
|-------------------|-----|--------|-------------------|-------------------------------------------------------------------------------------------------|--------------------------------|-----------------------------------------------------------|---------------------------------------------------------|------------------------------------------------------------------------------------------------------|-------------------------------------------------------------------------------------------------------|
| Rembacke<br>n B J | 120 | 1 year | Active<br>disease | 4 or more<br>liquid<br>stools a<br>day for<br>the last 7<br>days with<br>or<br>without<br>blood | Probiotics<br>vs<br>Mesalazine | Mutaflor<br>(Ardeypharm<br>GmbH,<br>Herdecke,<br>Germany) | E.coli<br>Nissle<br>1917<br>(Serotype<br>O6: K5:<br>H1) | Remission rates,<br>duration of<br>remission.Sigmoidosco<br>py scores and clinical<br>activity Index | Equal effect of<br>mesalazine and EcN<br>in attaining<br>remission, time and<br>duration of remission |
|-------------------|-----|--------|-------------------|-------------------------------------------------------------------------------------------------|--------------------------------|-----------------------------------------------------------|---------------------------------------------------------|------------------------------------------------------------------------------------------------------|-------------------------------------------------------------------------------------------------------|

|         |     |         |                                      |                                                       |                       |                                 |                                                                                                                                             |                                                    |                                                                                                                                            |
|---------|-----|---------|--------------------------------------|-------------------------------------------------------|-----------------------|---------------------------------|---------------------------------------------------------------------------------------------------------------------------------------------|----------------------------------------------------|--------------------------------------------------------------------------------------------------------------------------------------------|
| Sood A. | 147 | 6 weeks | Mild or moderate activity of disease | Ulcerative Colitis Disease Activity Index (UCDAI:3-9) | Probiotics vs Placebo | VSL#3 (VSL Pharmaceuticals, MD) | L. paracasei , L. plantarum , L. acidophilus L. delbrueckii subsp bulgaricus , B. longum , B. breve,B. Infantis ,Streptococcus thermophilus | Ulcerative Colitis Disease Activity Index (UCDAI). | Individual UCDAI score decrease was higher in test group. More patients achieved remission and mean decrease rate was higher in test group |
|---------|-----|---------|--------------------------------------|-------------------------------------------------------|-----------------------|---------------------------------|---------------------------------------------------------------------------------------------------------------------------------------------|----------------------------------------------------|--------------------------------------------------------------------------------------------------------------------------------------------|

|           |    |         |                                      |                                                       |                       |                                                       |                              |                                                                                      |                                                                          |
|-----------|----|---------|--------------------------------------|-------------------------------------------------------|-----------------------|-------------------------------------------------------|------------------------------|--------------------------------------------------------------------------------------|--------------------------------------------------------------------------|
| Tamaki H. | 56 | 8 weeks | Mild or moderate activity of disease | Ulcerative Colitis Disease Activity Index (UCDAI:3-9) | Probiotics vs Placebo | BB536 (Morinaga Milk Industry Co., Ltd, Tokyo, Japan) | Bifidobacterium longum BB536 | UC disease activity index (UCDAI), Rachmilewitz endoscopic index (EI), Mayo subscore | Significant decrease of UCDAI scores and endoscopic index in test group. |
|-----------|----|---------|--------------------------------------|-------------------------------------------------------|-----------------------|-------------------------------------------------------|------------------------------|--------------------------------------------------------------------------------------|--------------------------------------------------------------------------|

|          |     |         |                                      |                                                       |                       |                                        |                                                                                                                                             |                                                                          |                                                                                                              |
|----------|-----|---------|--------------------------------------|-------------------------------------------------------|-----------------------|----------------------------------------|---------------------------------------------------------------------------------------------------------------------------------------------|--------------------------------------------------------------------------|--------------------------------------------------------------------------------------------------------------|
| Tursi A. | 144 | 8 weeks | Mild or moderate activity of disease | Ulcerative Colitis Disease Activity Index (UCDAI:3-9) | Probiotics vs Placebo | VSL#3(VSL Pharmaceuticals, Towson, MD) | L. paracasei , L. plantarum , L. acidophilus L. delbrueckii subsp bulgaricus , B. longum , B. breve,B. Infantis ,Streptococcus thermophilus | UC disease activity index (UCDAI), Endoscopic score, subjective symptoms | In test group more patients achieved remission, had decreased UCDAI score, in endoscopic scores and symptoms |
|----------|-----|---------|--------------------------------------|-------------------------------------------------------|-----------------------|----------------------------------------|---------------------------------------------------------------------------------------------------------------------------------------------|--------------------------------------------------------------------------|--------------------------------------------------------------------------------------------------------------|

|               |    |           |                                                |                                                                                                    |                       |                                                                 |                                                                                            |                                                                                                   |                                                                                                |
|---------------|----|-----------|------------------------------------------------|----------------------------------------------------------------------------------------------------|-----------------------|-----------------------------------------------------------------|--------------------------------------------------------------------------------------------|---------------------------------------------------------------------------------------------------|------------------------------------------------------------------------------------------------|
| Wildt S.      | 32 | 52 weeks  | Inactive disease                               | Disease in remission for at least 4 weeks, simple clinical colitis activity index (SCCAI $\leq$ 4) | Probiotics vs Placebo | Probio-Tec AB-25 (Chr. Hansen A/S, Hoersholm Denmark)           | L.acidophilus strain LA-5 and B. animalis subsp. lactis strain BB-12                       | Simple clinical colitis activity index (SCCAI), sigmoidoscopy score and blood-serological markers | More patients in test group achieved remission. Median relapse time was longer in test group.  |
| Yoshimatsu Y. | 46 | 12 months | Patients with both active and inactive disease | Clinical Activity Index (CAI $<$ 6)                                                                | Probiotics vs Placebo | Bio-Three tablets(Toa Pharmaceutica I Co., Ltd., Toyama, Japan) | Streptococcus faecalis T-110), Clostridium butyricum TO-A), and Bacillus mesentericus TO-A | Remission maintenance rate and relapse episodes.                                                  | Remission rate was higher in test group and relapse was presented more often in control group. |

|          |     |                 |                                      |                                |                               |                                                      |                              |                                                                                     |                                                                                               |
|----------|-----|-----------------|--------------------------------------|--------------------------------|-------------------------------|------------------------------------------------------|------------------------------|-------------------------------------------------------------------------------------|-----------------------------------------------------------------------------------------------|
| Zocco A. | 187 | 6 and 12 months | Inactive disease                     | Colitis Activity Index (CAI<4) | Probiotics vs Mesalazine      | Giflorex( Errekappa, Euroterapici SpA, Milan, Italy) | Lactobacillus GG             | Colitis Activity Index (CAI), blood-serological markers and histological scores     | No difference in relapse rate between groups. Differences between groups were NS.             |
| Fan H.   | 40  | 40 days         | Mild or moderate activity of disease | UCDAI and CDAI                 | 5-ASA vs Probiotics and 5-ASA | BIFICO (Jincheng Haisi Pharmaceutica l Co)           | Bifid Triple Viable Capsules | Crohn's disease activity index (CDAI), UC activity index (UCAI) and recurrence rate | Observation group had significantly lower scores in CDAI and UCAI as well as recurrence rate. |



|            |     |         |                  |                         |                       |                                             |                                                                                                                                                      |                                                                                                           |                                                                                                                              |
|------------|-----|---------|------------------|-------------------------|-----------------------|---------------------------------------------|------------------------------------------------------------------------------------------------------------------------------------------------------|-----------------------------------------------------------------------------------------------------------|------------------------------------------------------------------------------------------------------------------------------|
| McInnes I. | 143 | 4 weeks | Inactive disease | Harvey Bradshaw score<5 | Probiotics vs Placebo | Symprove (Symprove Ltd, Farnham, Surrey UK) | Lactobacillus rhamnosus NCIMB 30174, Lactobacillus plantarum NCIMB 30173, Lactobacillus acidophilus NCIMB 30175 and Enterococcus faecium NCIMB 30176 | IBD Quality of Life Questionnaire results (QOL), faecal calprotectin (FCAL) and blood-serological markers | Reduced faecal calprotectin (FCAL) in UC patients. NS for CD. No differences in IBD-QOL scores and blood-serological markers |
|------------|-----|---------|------------------|-------------------------|-----------------------|---------------------------------------------|------------------------------------------------------------------------------------------------------------------------------------------------------|-----------------------------------------------------------------------------------------------------------|------------------------------------------------------------------------------------------------------------------------------|

|            |    |         |                                                |                                                                   |                               |       |                        |                                                                                                                                 |                                                                                                                             |
|------------|----|---------|------------------------------------------------|-------------------------------------------------------------------|-------------------------------|-------|------------------------|---------------------------------------------------------------------------------------------------------------------------------|-----------------------------------------------------------------------------------------------------------------------------|
| Yilmaz Il. | 45 | 4 weeks | Patients with both active and inactive disease | CD Activity Index(<450) and Truelove-Witts scoring systems for UC | Probiotics vs no intervention | Kefir | Lactobacillus bacteria | Symptoms, clinical activity index and blood-serological markers (C-reactive protein (CRP),erythrocyte sedimentation rate (ESR)) | Significant decrease in ESR and CRP in test group. Bloating scores significantly reduced and feeling good scores increased. |
|------------|----|---------|------------------------------------------------|-------------------------------------------------------------------|-------------------------------|-------|------------------------|---------------------------------------------------------------------------------------------------------------------------------|-----------------------------------------------------------------------------------------------------------------------------|
